# Supplementary material for: Structural and catalytic studies of lithium complexes bearing pendant aminophenolate ligands
Source: Royal Society of Chemistry journal article supplement (doi:10.1039/b717370a), 2008-01-01
Supplement: b717370a.pdf [file b717370a.pdf]

Supporting Information

## **Structural and Catalytic Studies of Lithium Complexes Bearing Pendant**

### **Amino-Phenolate Ligands**

Chi-An Huang, Chia-Lin Ho and Chi-Tien Chen\*

*Department of Chemistry, National Chung Hsing University, Taichung 402, Taiwan*

*E-mail: [ctchen@dragon.nchu.edu.tw](mailto:ctchen@dragon.nchu.edu.tw)*

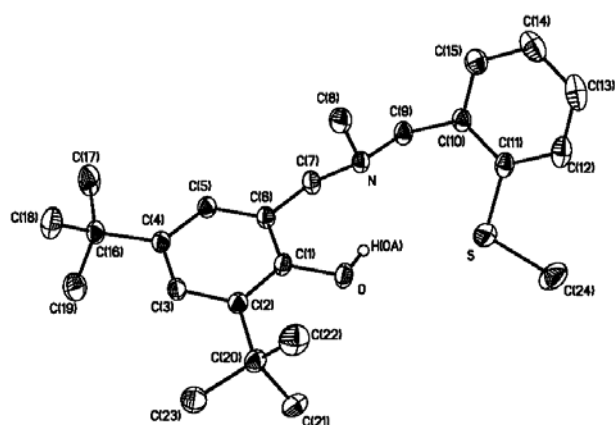

**Fig.S1** Molecular structure of  $\text{HON}^{\text{Me}}\text{Ph}^{\text{SMc}}$ . Only hydrogen atom on the oxygen atom of phenol is exhibited.

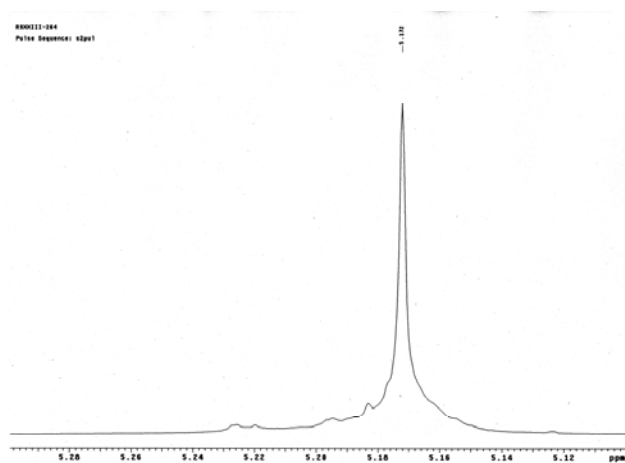

**Fig.S2** Homonuclear-decoupled methine  $^1\text{H}$  NMR spectrum (400 MHz,  $\text{CDCl}_3$ ) of poly(L-Lactide) synthesized at  $26.5^\circ\text{C}$  for 5 min in  $\text{CH}_2\text{Cl}_2$  using **6** as initiator at  $\{[\text{M}]_0:[\text{Li}]_0\}:[\text{BnOH}] = 50:1$  (Table 1 entry 10).
